# Supplementary material for: Growth, linear and nonlinear optical properties of a DSSS crystal
Source: Royal Society of Chemistry journal article supplement (doi:10.1039/c4ce00554f), 2014-01-01
Supplement: c4ce00554f1.pdf [file c4ce00554f1.pdf]

CASTEP Optical Properties  
Scissors operator = 0 eV, Instrumental smearing : 0.5 eV  
Calculation geometry: Polarized, polarization direction: (1.000 0.000 0.000)

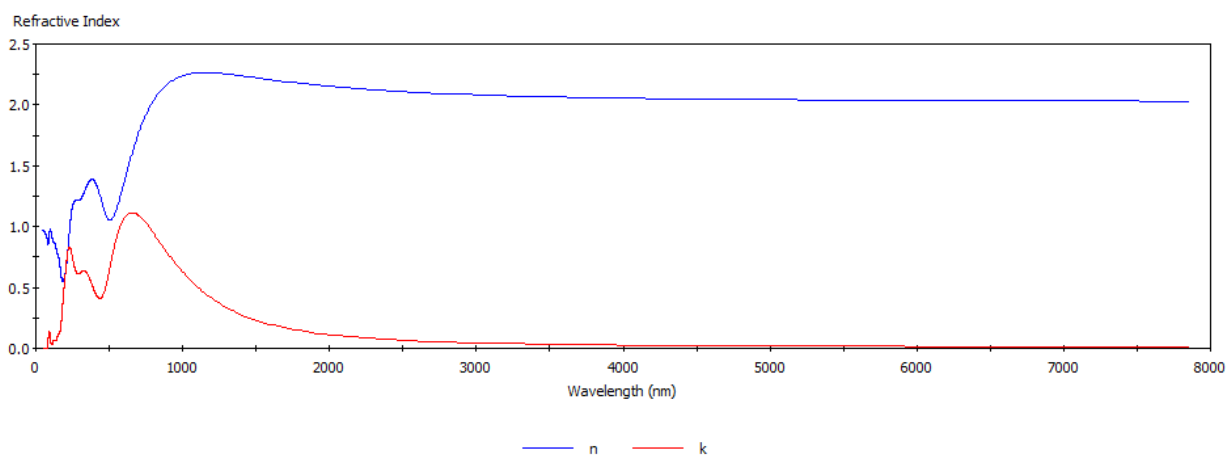

S 1. real and imaginary part of Refractive index along 010 direction

CASTEP Optical Properties  
Scissors operator = 0 eV, Instrumental smearing : 0.5 eV  
Calculation geometry: Polarized, polarization direction: (0.000 1.000 0.000)

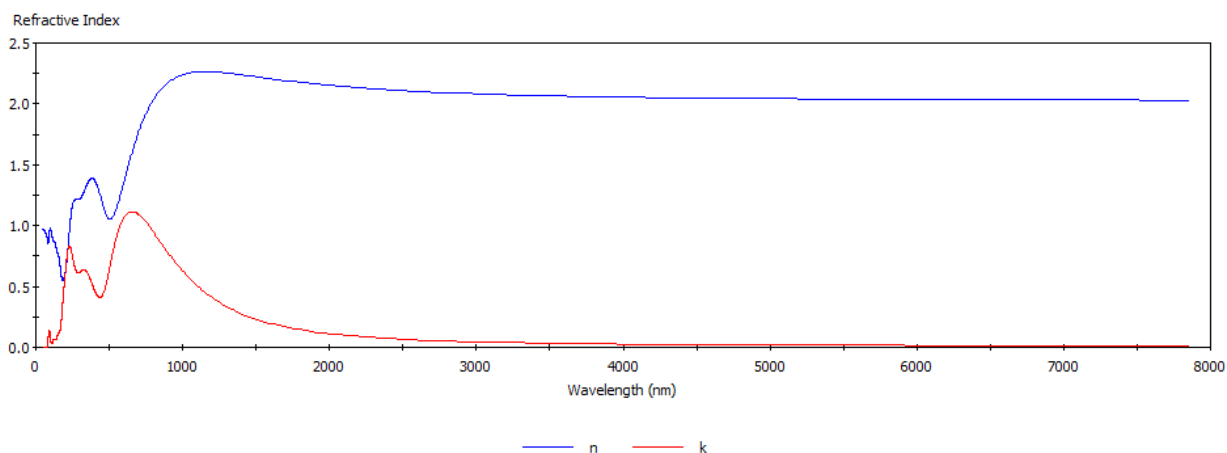

S 2. real and imaginary part of Refractive index along 010 direction

CASTEP Optical Properties  
Scissors operator = 0 eV, Instrumental smearing : 0.5 eV  
Calculation geometry: Polarized, polarization direction: (0.000 0.000 1.000)

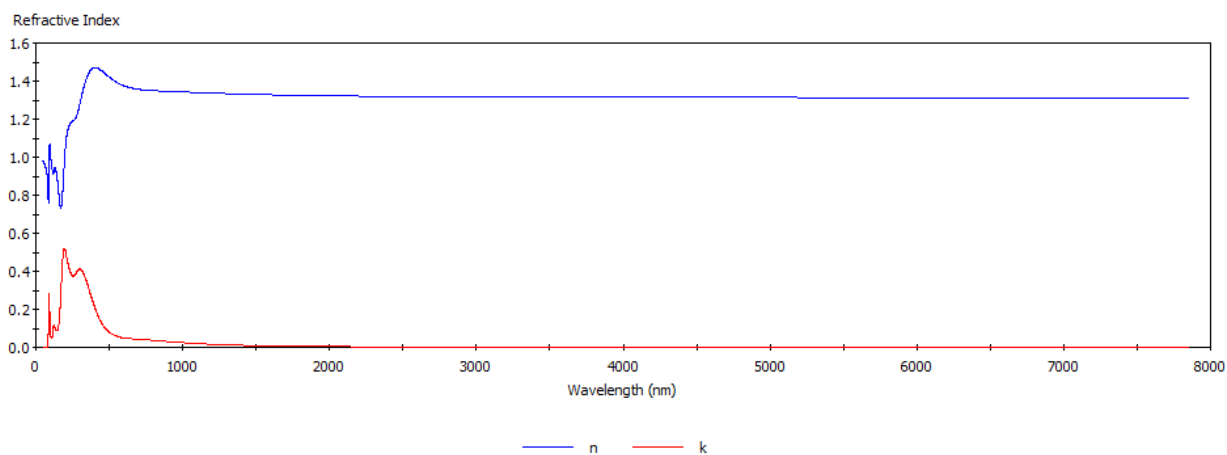

S 3. real and imaginary part of Refractive index along 001 direction

### Convergence test

The accuracy of refractive index ( $n_1$ ) at 1550 nm is calculated for five different plane wave cut-off energies. The chosen values of refractive index at 400 eV and  $k$  point mesh (4x4) were found to converge within 0.00086 with respect to higher values of refractive index at 700 eV and 9x 9x1  $k$  point mesh.

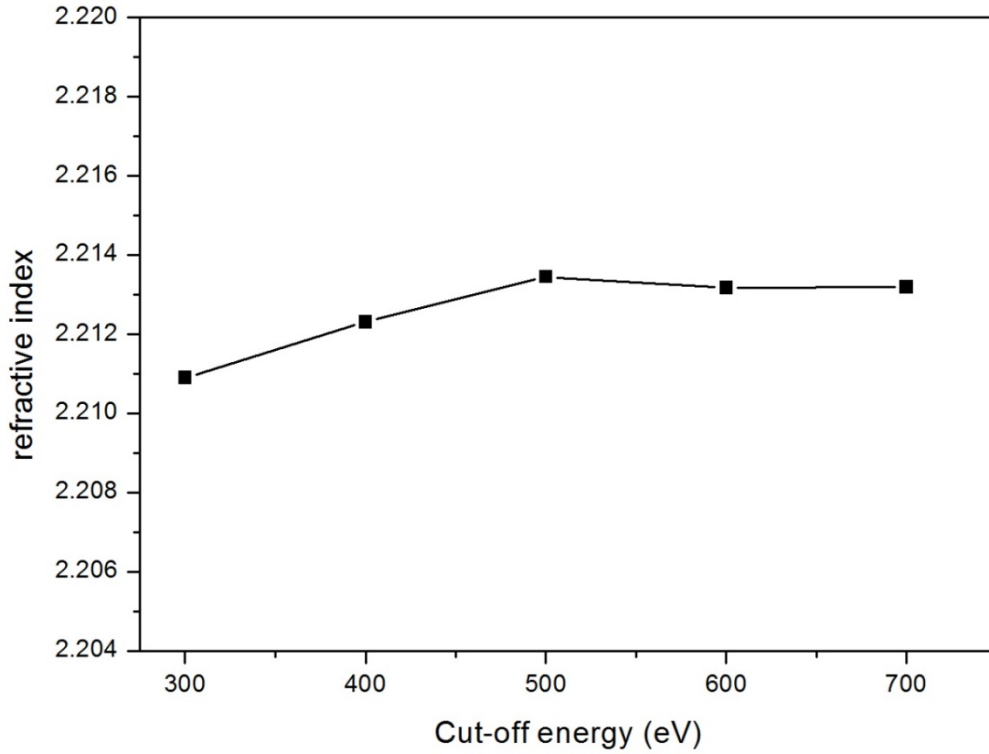

S 4 Convergence test on the dependence of refractive index on cut-off energy

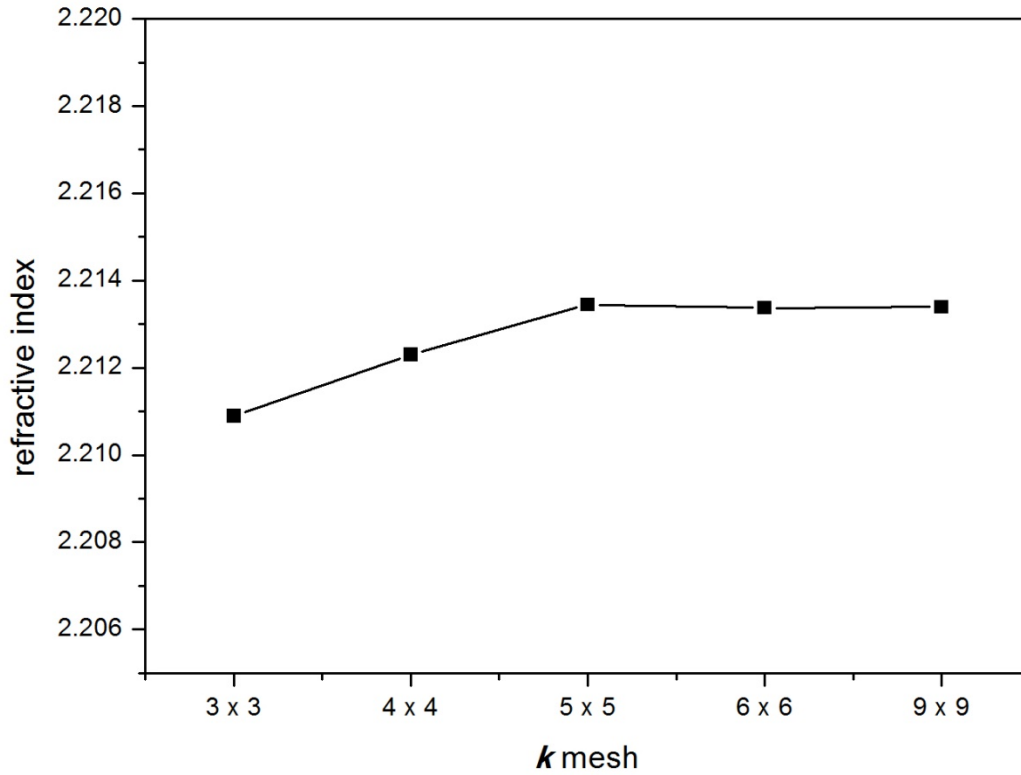

S 5 Convergence test on the dependence of refractive index on  $k$  point mesh.
